# Supplementary material for: The tRNAVal half: A strong endogenous Toll-like receptor 7 ligand with a 5′-terminal universal sequence signature
Source: PubMed Central journal article supplement — Proc Natl Acad Sci U S A. 2024 Apr 29;121(19):e2319569121. doi: 10.1073/pnas.2319569121 (PMC11087793; doi:10.1073/pnas.2319569121), 2024-04-29
Supplement: pnas.2319569121.sapp.pdf [file pnas.2319569121.sapp.pdf]

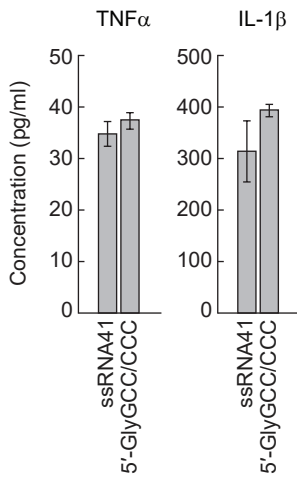

**Figure S1. The activity of the 5'-tRNA<sup>GlyGCC/CCC</sup> half**

After RNA transfection into HMDMs using DOTAP, culture medium was subjected to measurement of concentration of the indicated cytokines. Error bars indicate mean  $\pm$  SD of triplicate measurements.

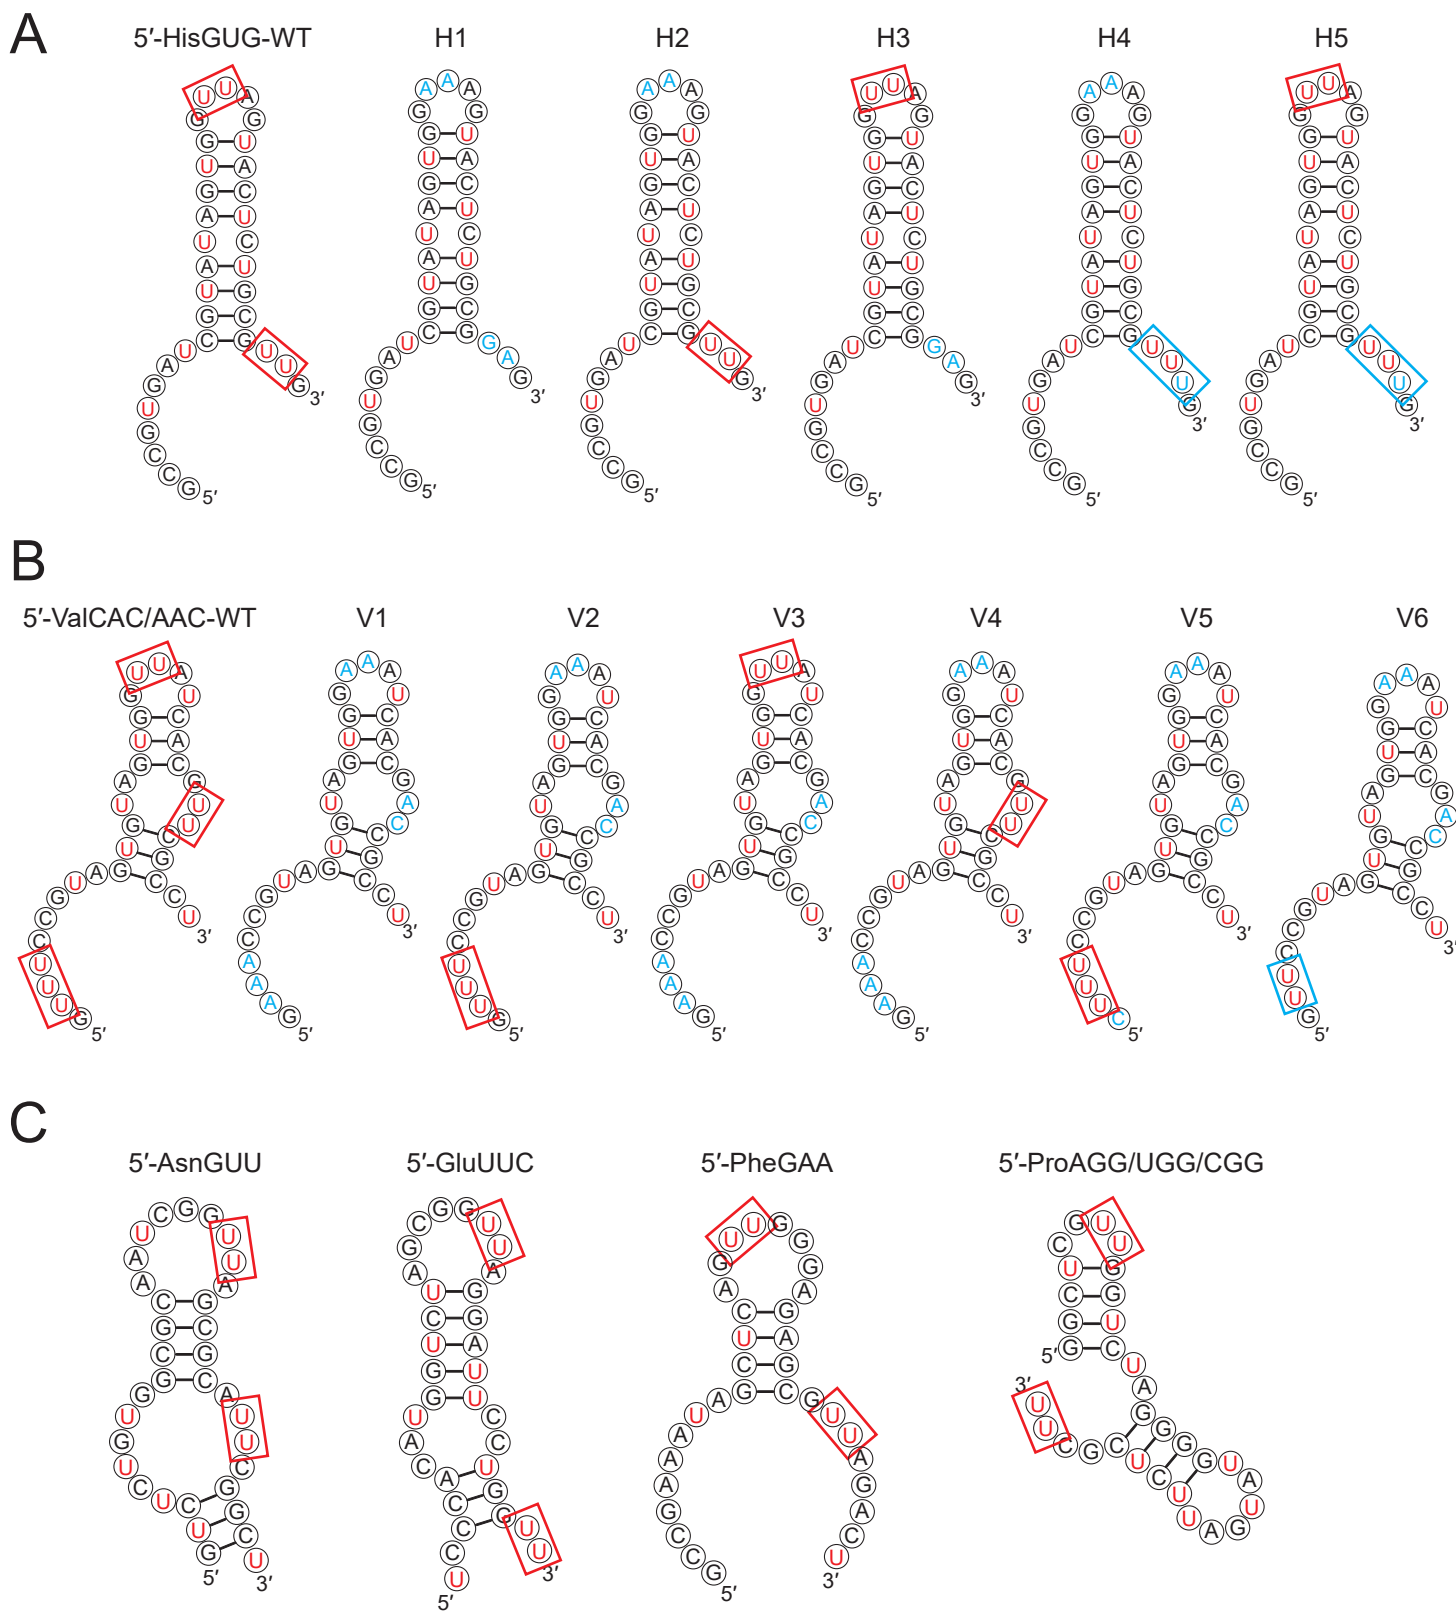

**Figure S2. Secondary structure of 5'-tRNA halves and their mutants**

(A-C) Secondary structures of the 5'-tRNA<sup>HisGUG</sup> half and its mutants (A) or the 5'-tRNA<sup>ValCAC/AAC</sup> half and its mutants (B), and other 5'-tRNA halves which possess more than two successive Us in the single-stranded regions (C) are shown. The presence of successive Us are highlighted (Us are shown in red), and the mutated nucleotides are shown in blue.

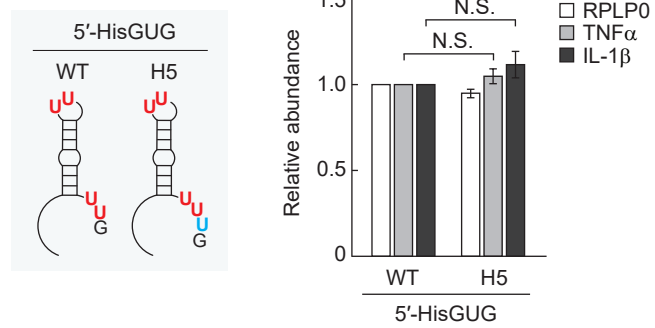

**Figure S3. The activity of the mutant 5'-tRNA<sup>HisGUG</sup> half**

The wild-type and H5 mutant of 5'-tRNA<sup>HisGUG</sup> half were subjected to DOTAP-mediated transfection into HMDMs. Total RNAs from the cells were subjected to RT-qPCR for the indicated mRNAs.

**Supplementary Table 1. Abundant 5'-tRNA half species in sequencing data of HMDM-secreted EVs**

| No. | Sequence (5'-3')                     | Length (nt) | Isoacceptor | % to total 5'-tRNA half reads |           |
|-----|--------------------------------------|-------------|-------------|-------------------------------|-----------|
|     |                                      |             |             | Library 1                     | Library 2 |
| #1  | GUUCCGUAGUGUAGUGGUUAUCACGUUCGCCU*    | 33          | ValCAC/AAC  | 17.84                         | 17.43     |
| #2  | GUUCCGUAGUGUAGUGGUUAUCACGUUCGCCUC    | 34          | ValCAC      | 14.24                         | 13.35     |
| #3  | GCCGUGAUCGUAGUAGUGGUUAGUACUCUGCGUUG* | 34          | HisGUG      | 10.93                         | 14.80     |
| #4  | GCAUUGGUGGUUCAGUGGUAGAAUUCUCGCCU*    | 32          | GlyGCC/CCC  | 9.63                          | 5.08      |
| #5  | GUUCCGUAGUGUAGUGGUUAUCACGUUCGCCUCAC  | 36          | ValCAC      | 3.56                          | 4.21      |
| #6  | GCAUGGGUGGUUCAGUGGUAGAAUUCUCGCCU     | 32          | GlyGCC      | 2.95                          | 1.31      |
| #7  | UCCUGGUGGUCUAGUGGUUAGGAUUCGGCGCUCUC  | 36          | GluCUC      | 2.55                          | 2.57      |
| #8  | GCAUUGGUGGUUCAGUGGUAGAAUUCUCGCC      | 31          | GlyGCC/CCC  | 2.54                          | 1.94      |
| #9  | UCCUGGUGGUCUAGUGGUUAGGAUUCGGCGCU     | 33          | GluCUC      | 2.51                          | 3.06      |
| #10 | GCAUUGGUGGUUCAGUGGUAGAAUUCUCGCCUGC   | 34          | GlyGCC      | 2.48                          | 2.37      |
| #11 | GUUCCGUAGUGUAGUGGUCAUCACGUUCGCCU     | 33          | ValAAC      | 2.46                          | 3.87      |
| #12 | GUUCCGUAGUGUAGUGGUCAUCACGUUCGCCUAAC  | 36          | ValAAC      | 2.35                          | 2.62      |
| #13 | GUUCCGUAGUGUAGUGGUUAUCACGUUCGCCUAAC  | 36          | ValAAC      | 2.28                          | 2.88      |
| #14 | UCCUGGUGGUCUAGUGGUUAGGAUUCGGCGCUCU   | 35          | GluCUC      | 1.88                          | 1.77      |
| #15 | UCCUGGUGGUCUAGUGGUUAGGAUUCGGCGC      | 32          | GluCUC      | 1.67                          | 2.49      |
| #16 | UCCUGGUGGUCUAGUGGUUAGGAUUCGGCGCUC    | 34          | GluCUC      | 1.14                          | 1.04      |
| #17 | GCUUCUGUAGUGUAGUGGUUAUCACGUUCGCCU    | 33          | ValCAC      | 1.02                          | 1.15      |

The sequences with asterisk (#1, #3, and #4) were selected and analyzed.

**Supplementary Table 2. Ratio of the 5'-tRNA half reads derived from respective tRNA isoacceptors in HMDM Evs**

| No. | Isoacceptor | % to total 5'-tRNA half reads |           |
|-----|-------------|-------------------------------|-----------|
|     |             | Library 1                     | Library 2 |
| #1  | ValCAC/AAC  | 47.25                         | 48.92     |
| #2  | GlyGCC/CCC  | 20.07                         | 13.69     |
| #3  | HisGUG      | 13.61                         | 18.29     |
| #4  | GluCUC      | 9.94                          | 11.08     |
| #5  | GluUUC      | 4.62                          | 2.97      |
| #6  | LysCUU      | 2.56                          | 3.30      |
| #7  | MetCAU      | 0.71                          | 0.76      |
| #8  | AspGUC      | 0.58                          | 0.27      |
| #9  | ProUGG      | 0.12                          | 0.06      |
| #10 | ProAGG      | 0.11                          | 0.06      |
|     | Others      | 0.42                          | 0.58      |
|     | Total       | 100.00                        | 100.00    |

**Supplementary Table 3. Sequences of synthetic RNAs used in this study**

| RNA                        | Sequence (5'–3')                                                                       | Licence plate         | tDRname               |
|----------------------------|----------------------------------------------------------------------------------------|-----------------------|-----------------------|
| 5'-AsnGUU                  | GUCUCUGUGGCGCAAUCGGUUAAGCGCAUUCGGCU                                                    | tRF-34-S998LOW3VHJ9IW | tDR-1:33-Asn-GTT-3    |
| 5'-GluUUC                  | UCCCAUAUGGUUAGCGGUUAGGAUUCUGGUU                                                        | tRF-33-86J8WPMN1E8Y0E | tDR-1:33-Glu-TTC-2    |
| 5'-GlyGCC/CCC              | GCAUUGGUGGUUACAGUGGUAGAAUUCUCGCCU                                                      | tRF-32-PNR8YP9LON4V3  | tDR-1:33-Gly-CCC-1-M4 |
| 5'-HisGUG                  | GCCGUGAUCGUUAGUGGUUAGUACUCUGCGUUG                                                      | tRF-34-PW5SVP9N15WV2P | tDR-1:34-His-GTG-1    |
| 5'-HisGUG-H1               | GCCGUGAUCGUUAGUGGAAAGUACUCUGCGGAG                                                      | nlr-34-PW5SVP9B15WV1S | N/A                   |
| 5'-HisGUG-H2               | GCCGUGAUCGUUAGUGGAAAGUACUCUGCGUUG                                                      | nlr-34-PW5SVP9B15WV2P | N/A                   |
| 5'-HisGUG-H3               | GCCGUGAUCGUUAGUGGUUAGUACUCUGCGGAG                                                      | nlr-34-PW5SVP9N15WV1S | N/A                   |
| 5'-HisGUG-H4               | GCCGUGAUCGUUAGUGGAAAGUACUCUGCGUUUG                                                     | nlr-35-PW5SVP9B15WV7Y | N/A                   |
| 5'-HisGUG-H5               | GCCGUGAUCGUUAGUGGUUAGUACUCUGCGUUUG                                                     | nlr-35-PW5SVP9N15WV7Y | N/A                   |
| 5'-PheGAA                  | GCCGAAUAGCUCAGUUGGGAGAGCGUUAGACU                                                       | tRF-33-PUDP4PZKFJ7PW  | tDR-1:33-Phe-GAA-1-M2 |
| 5'-ProAGG/UGG/CGG          | GGCUCGUUGGUCUAGGGGUAUGAUUCUCGCUU                                                       | tRF-32-6978WPRLXN4VQ  | tDR-1:33-Pro-AGG-1-M5 |
| 5'-ValCAC/AAC              | GUUUCCGUAGUGUAGUGGUUAUCACGUUCGCCU                                                      | tRF-33-79MP9P9NH57SD3 | tDR-1:33-Val-AAC-1-M6 |
| 5'-ValCAC/AAC modification | GUUUCCGUAGUGΨAGDGGDDAUCACm <sup>2</sup> GΨUCGCCU                                       | tRF-33-79MP9P9NH57SD3 | N/A                   |
| 5'-ValCAC/AAC-V1           | GAAACCGUAGUGUAGUGGAAUUCACGACCGCCU                                                      | nlr-33-ODMP9P9BH5OSD3 | N/A                   |
| 5'-ValCAC/AAC-V2           | GUUUCCGUAGUGUAGUGGAAUUCACGACCGCCU                                                      | nlr-33-79MP9P9BH5OSD3 | N/A                   |
| 5'-ValCAC/AAC-V3           | GAAACCGUAGUGUAGUGGUUAUCACGACCGCCU                                                      | nlr-33-ODMP9P9NH5OSD3 | N/A                   |
| 5'-ValCAC/AAC-V4           | GAAACCGUAGUGUAGUGGAAUUCACGUUCGCCU                                                      | nlr-33-ODMP9P9BH57SD3 | N/A                   |
| 5'-ValCAC/AAC-V5           | CUUUCCGUAGUGUAGUGGAAUUCACGACCGCCU                                                      | nlr-33-N9MP9P9BH5OSD3 | N/A                   |
| 5'-ValCAC/AAC-V6           | GUUUCCGUAGUGUAGUGGAAUUCACGACCGCCU                                                      | nlr-32-7RS3S36B8H0V3  | N/A                   |
| FL-ValCAC                  | GUUUCCGUAGUGUAGUGGUUAUCACGUUCGCCUCACACGCGAAAGGUCCCCGGUUCGAAACCGGGCGGAAACACCA           | N/A                   | N/A                   |
| miR-122-5p                 | UGGAGUGUGACAAUGGUGUUUG                                                                 | iso-22-909U247NP      | N/A                   |
| miR-548ah-5p               | AAAAGUGAUUGCAGUGUUUG                                                                   | iso-20-BOXNP37Y       | N/A                   |
| miR-552-5p                 | GUUUAACCUUUUGCCUGUUGG                                                                  | iso-21-7X0ZZ19Y0      | N/A                   |
| Spike-in                   | GGGAGGCAAGCCCGACGUCGUCCAGAUUGUCCGC                                                     | nlr-34-R0P0KUMS8PIW1M | N/A                   |
| ssRNA40                    | GCCCGUCUGUUGUGUGACUC                                                                   | nlr-20-PSWW9WO9       | N/A                   |
| ssRNA41                    | GCCCGACAGAGAGACAC                                                                      | nlr-20-PS02F2O5       | N/A                   |
| AS-oligo                   | mA*mG*mG*mC*mG*mA*mA*mC*mG*mU*mG*A*T*A*A*C*C*A*C*T*A*C*A*mC*mU*mA*mC*mG*mG*mA*mA*mA*mC | N/A                   | N/A                   |
| Ctrl-oligo                 | mC*mA*mA*mA*mA*mG*mU*mC*mU*mC*A*A*A*G*C*A*C*C*C*G*C*A*A*mG*mC*mU*mU*mA*mA*mA*mG*mG*mG  | N/A                   | N/A                   |

Mutated nucleotides are shown in blue.

**Supplementary Table 4. The most abundant sequences of EV-5'-tRNA halves derived from the respective isoacceptors and the presence of successive Us**

| Sequence (5'-3')                      | Length (nt) | % to total 5'-half reads | Isoacceptor    | UU(U) in single-stranded regions |       |
|---------------------------------------|-------------|--------------------------|----------------|----------------------------------|-------|
|                                       |             |                          |                | Loop                             | Other |
| GGGGAUUAGCUCAAAUGGUAGAGCGCUCGCUU      | 33          | 0.0007                   | AlaAGC         | 1                                | 1     |
| GGGGAUGUAGCUCAGUGGUAGAGCGCGCGC        | 30          | 0.0025                   | AlaCGC         | 0                                | 0     |
| GGGGAUGUAGCUCAGUGGUAGAGCGCAUGCUUUGCAC | 37          | 0.0001                   | AlaUGC         | 0                                | 1     |
| GGGCCAGUGGCGCAAUGGAUAACGCGUCUGACU     | 33          | 0.0055                   | ArgACG         | 0                                | 0     |
| GACCCAGUGGCCUAAUGGAUAAGGCAUCAGCCU     | 33          | 0.0116                   | ArgCCG         | 0                                | 0     |
| GCCCCAGUGGCCUAAUGGAUAAGGCACUGGCCUCCU  | 36          | 0.0003                   | ArgCCU         | 0                                | 0     |
| GACCGCGUGGCCUAAUGGAUAAGGCGUCUGACU     | 33          | 0.0047                   | ArgUCG         | 0                                | 0     |
| GGCUCGUGGCGCAAUGGAUAGCGCAUUGGACU      | 33          | 0.0297                   | ArgUCU         | 0                                | 1     |
| GUCUCUGUGGCGCAAUCGGUUAGCGCAUUCGGCU*   | 34          | 0.0021                   | AsnGUU         | 2                                | 0     |
| UCCUCGUUAGUAUAGUGGUGAGUAUCCCGCCUGUC   | 36          | 0.4176                   | AspGUC         | 0                                | 1     |
| GGGGUUAUAGCUCAGUGGGUAGAGCAUUUGACU     | 33          | 0.0003                   | CysGCA         | 0                                | 1     |
| GGUUCUAGUGGUAAUGGUUAGCACUCUGGACUCU    | 35          | 0.0190                   | GlnCUG         | 1                                | 1     |
| GGCCCCAUGGUGUAAUGGUUAGCACUCUGGACU     | 33          | 0.0006                   | GlnUUG         | 1                                | 0     |
| UCCCUGGUGGUCUAGUGGUUAGGAUUCGGCGCU     | 33          | 3.0580                   | GluCUC         | 0                                | 2     |
| UCCCACAUGGUCUAGCGGUUAGGAUUCUGGUU*     | 33          | 1.0244                   | GluUUC         | 1                                | 2     |
| GCAUUGGUGGUUCAGUGGAUAAGAUUCUGCCU*     | 33          | 9.6276                   | GlyGCC/CC      | 0                                | 3     |
| GCGUUGGUGGUUAGUGGUGAGCAUAGCUGCCUCC    | 36          | 0.0008                   | GlyUCC         | 0                                | 2     |
| GCCGUAUCGUUAGUGGUUAGUACUCUGCGUUG*     | 34          | 14.7964                  | HisGUG         | 1                                | 1     |
| GGCCGGUUAAGCUCAGUCGGCUAGAGCGUGGUCUA   | 35          | 0.0002                   | IleAAU         | 0                                | 1     |
| GGUAGCGUGGCCGAGCGGUCUAGGCGCUGGAUU     | 34          | 0.0025                   | LeuAAG         | 0                                | 1     |
| GUCAGGAUGGCCGAGUGGUCUAGGCGCCAGAC      | 33          | 0.0013                   | LeuCAA         | 0                                | 0     |
| GUCAGGAUGGCCGAGCGGUCUAGGCGCUGCGUUC    | 35          | 0.1067                   | LeuCAG         | 0                                | 1     |
| GUUAAGAUGGCAGAGCCUGGUUAGCAUAAAACUUA   | 37          | 0.0235                   | LeuUAA         | 0                                | 3     |
| GGUAGUGUGGCCGAGCGGUCUAGGCGCUGGAUU     | 34          | 0.0004                   | LeuUAG         | 0                                | 1     |
| GCCCCGCUAGCUCAGUCGGUAGAGCAUGAGACU     | 33          | 0.8703                   | LysCUU         | 0                                | 0     |
| GCCCCGAUAGCUCAGUCGGUAGAGCAUCAGACU     | 33          | 0.0441                   | LysUUU         | 0                                | 0     |
| AGCAGAGUGGCGCAGCGGAAGCGUGCUGGGCCC     | 33          | 0.4089                   | MetCAU         | 0                                | 0     |
| GCCGAAUAGCUCAGUUGGGAGAGCGUUAAGACU*    | 33          | 0.0003                   | PheGAA         | 1                                | 1     |
| GGCUCGUUGGUCUAGGGGUUAGAUUCUCGCUU*     | 32          | 0.2057                   | ProAGG/UGG/CGG | 1                                | 2     |
| GCCCCGAUAGUCCUAGUGGUCUGGGGUGCAGGCUUC  | 37          | 0.0300                   | SeCUCA         | 0                                | 1     |
| GUAGUCGUGGCCGAGUGGUUAGGCGAUGGAC       | 32          | 0.0001                   | SerAGA         | 1                                | 0     |
| GCUUGAUGGCCGAGUGGUUAGGUGUUGGACU       | 33          | 0.0000                   | SerCGA         | 0                                | 2     |
| GACGAGGUGGCCGAGUGGUUAGGCGAUGGAC       | 32          | 0.0004                   | SerGCU         | 0                                | 1     |
| GCAGCGAUGGCCGAGUGGUUAGGCGUUGGACUUGA   | 36          | 0.0000                   | SerUGA         | 0                                | 3     |
| GGCAGAGUGGUGCAGCGGAAGCGUCUGGGC        | 31          | 0.0001                   | ThrCGU         | 0                                | 0     |
| GGCUCUAGCUCAGGGGUUAGAGCACUGGUCU       | 33          | 0.0021                   | ThrUGU         | 1                                | 0     |
| GACCUUGGUGCGCAACGGUAGCGGUCUGACUCC     | 34          | 0.0012                   | TrpCCA         | 0                                | 0     |
| CCUUCGAUAGCUCAGCUGGUAGAGCGGAGACUGUAG  | 37          | 0.0000                   | TyrGUA         | 0                                | 1     |
| GUUUCGUAGUGUAGUGGUUAUCACGUUCGCCU*     | 33          | 16.6442                  | ValCAC/AAC     | 2                                | 1     |
| GGUUCUAGUGUAGUGGUUAUCACGUCUGCUUU      | 34          | 0.0568                   | ValUAC         | 1                                | 2     |

The sequences with asterisk were selected and analyzed.

**Supplementary Table 5. Primer sequences for the synthesis of dsDNA templates that were used for *in vitro* RNA synthesis**

| RNA               | Primer  | Sequence (5'-3')                                                  |
|-------------------|---------|-------------------------------------------------------------------|
| 5'-AsnGUU         | Forward | GCTTAATACGACTCACTATAGTCTCTGTGGCGCAA                               |
|                   | Reverse | mAmGCCGAATGCGCTAACCGATTGCGCCACAGAGAC                              |
| 5'-GluUUC         | Forward | CCTGCAGTAATACGACTCACTATAGGGAGACCATGTGGGACTGATGAGTCCGTGAGGACGAAACG |
|                   | Reverse | mAmACCAGGAATCCTAACCGCTAGACCATGTGGGAGACGGGTACCGGTACCGTTTCGTCC      |
| 5'-GlyGCC/CCC     | Forward | GCTTAATACGACTCACTATAGCATTGGTGGTTACG                               |
|                   | Reverse | mAmGGCGAGAATTCTACCACTGAACCACCAATGC                                |
| 5'-HisGUG         | Forward | GCTTAATACGACTCACTATAGCCGTGATCGTATAG                               |
|                   | Reverse | mCmAACGCAGAGTACTAACCACTATACGATCACGGC                              |
| 5'-HisGUG-H1      | Forward | GCTTAATACGACTCACTATAGCCGTGATCGTATAG                               |
|                   | Reverse | mCmUCCGCAGAGTACTTTCCACTATACGATCACGGC                              |
| 5'-HisGUG-H2      | Forward | GCTTAATACGACTCACTATAGCCGTGATCGTATAG                               |
|                   | Reverse | mCmAACGCAGAGTACTTTCCACTATACGATCACGGC                              |
| 5'-HisGUG-H3      | Forward | GCTTAATACGACTCACTATAGCCGTGATCGTATAG                               |
|                   | Reverse | mCmUCCGCAGAGTACTAACCACTATACGATCACGGC                              |
| 5'-HisGUG-H4      | Forward | GCTTAATACGACTCACTATAGCCGTGATCGTATAG                               |
|                   | Reverse | mCmAAACGCAGAGTACTTTCCACTATACGATCACGGC                             |
| 5'-HisGUG-H5      | Forward | GCTTAATACGACTCACTATAGCCGTGATCGTATAG                               |
|                   | Reverse | mCmAAACGCAGAGTACTAACCACTATACGATCACGGC                             |
| 5'-PheGAA         | Forward | GCTTAATACGACTCACTATAGCCGAAATAGCTCAG                               |
|                   | Reverse | mAmGTCTAACGCTCTCCCACTGAGCTATTTTCGGC                               |
| 5'-ProAGG/UGG/CGG | Forward | GCTTAATACGACTCACTATAGGCTCGTTGGTCTAG                               |
|                   | Reverse | mAmAGCGAGAATCATACCCTAGACCAACGAGCC                                 |
| 5'-ValCAC/AAC     | Forward | GCTTAATACGACTCACTATAGTTTCCGTAGTGTAG                               |
|                   | Reverse | mAmGGCGAACGTGATAACCACTACACTACGGAAC                                |
| 5'-ValCAC/AAC-V1  | Forward | GCTTAATACGACTCACTATAGAAACCGTAGTGTAG                               |
|                   | Reverse | mAmGGCGGTTCGTGATTTCCACTACACTACGGTTTC                              |
| 5'-ValCAC/AAC-V2  | Forward | GCTTAATACGACTCACTATAGTTTCCGTAGTGTAG                               |
|                   | Reverse | mAmGGCGGTTCGTGATTTCCACTACACTACGGAAC                               |
| 5'-ValCAC/AAC-V3  | Forward | GCTTAATACGACTCACTATAGAAACCGTAGTGTAG                               |
|                   | Reverse | mAmGGCGGTTCGTGATAACCACTACACTACGGTTTC                              |
| 5'-ValCAC/AAC-V4  | Forward | GCTTAATACGACTCACTATAGAAACCGTAGTGTAG                               |
|                   | Reverse | mAmGGCGAACGTGATTTCCACTACACTACGGTTTC                               |
| 5'-ValCAC/AAC-V5  | Forward | CCTGCAGTAATACGACTCACTATAGGGAGACTACGGAAAGCTGATGAGTCCGTGAGGAC       |
|                   | Reverse | mAmGGCGGTTCGTGATTTCCACTACACTACGGAAAGACGGGTACCGGTACCGTTTCGTCC      |
| 5'-ValCAC/AAC-V6  | Forward | GCTTAATACGACTCACTATAGTTCCGTAGTGTAGT                               |
|                   | Reverse | mAmGGCGGTTCGTGATTTCCACTACACTACGGAAC                               |
| FL-ValCAC         | Forward | GCTTAATACGACTCACTATAGTTTCCGTAGTGTAGTGGTTATCACGTTCCGCTCACAC        |
|                   | Reverse | mUmGGTGTTTCCGCCCGTTTCGAACCGGGGACCTTTCCGCTGTGAGGCG                 |
| miR-122-5p        | Forward | CCTGCAGTAATACGACTCACTATAGGGAGATCACACTCCACTGATGAGTCCGTGAGGACGAAA   |
|                   | Reverse | mCmAAACACCATTGTCACACTCCAGACGGGTACCGGTACCGTTTCGTCCCTC              |
| miR-548ah-5p      | Forward | CCTGCAGTAATACGACTCACTATAGGGAGAAATCACTTTTCTGATGAGTCCGTGAGGACGAAA   |
|                   | Reverse | mCmAAACACTGCAATCACTTTTGACGGGTACCGGTACCGTTTCGTCCCTC                |
| miR-552-5p        | Forward | GCTTAATACGACTCACTATAGTTTAACTT                                     |
|                   | Reverse | mCmCAACAGGCAAAAGGTTAAAC                                           |
| ssRNA41           | Forward | GCTTAATACGACTCACTATAGCCCGA                                        |
|                   | Reverse | mGmUGTCTCTTCTGTCTGGGCTATAGT                                       |

All synthetic probes and primers used in this study were synthesized by Integrated DNA Technologies. "mN" designates 2'-O-methylated nucleotide.



**Supplementary Table 6. Sequences of TaqMan probes and primers for TaqMan RT-qPCR**

| Target        | Probe/primer | Sequence (5'–3')                                    |
|---------------|--------------|-----------------------------------------------------|
| 5'-HisGUG     | Forward      | GCTCGCCGTGATCGTATAGT                                |
|               | Reverse      | GATCGTCCGACTGTAGAACTC                               |
|               | TaqMan       | /5HEX/TAGTACTCT/ZEN/GCGTTGGAACACTGCGTTTGC/3IABkFQ/  |
| 5'-ValCAC/AAC | Forward      | GTTTCCGTAGTGTAGTGGT                                 |
|               | Reverse      | GATCGTCCGACTGTAGAACTC                               |
|               | TaqMan       | /56-FAM/ACGTTCCGCC/ZEN/TGAACACTGCGTT/3IABkFQ/       |
| 5S rRNA       | Forward      | TACGGCCATACCACCCTGAAC                               |
|               | Reverse      | GATCGTCCGACTGTAGAACTC                               |
|               | TaqMan       | /56-FAM/CGGGTGCTG/ZEN/TAGGCTTTGAACACTGCGTT/3IABkFQ/ |
| Spike-in      | Forward      | GAGGCAAGCCCGACGT                                    |
|               | Reverse      | GATCGTCCGACTGTAGAACTC                               |
|               | TaqMan       | /56-FAM/GATTGTCCG/ZEN/CGAACACTGCGT/3IABkFQ/         |

TaqMan probes contain Hexachlorofluorescein (HEX), 6-carboxyfluorescein (FAM), ZEN, and Iowa Black (IABkFQ) as the fluorophore or quencher.

**Supplementary Table 7. Sequences of primers for standard RT-qPCR**

| Target       | Primer  | Sequence (5'-3')         |
|--------------|---------|--------------------------|
| TNF $\alpha$ | Forward | GAGCACTGAAAGCATGATCC     |
|              | Reverse | CGAGAAGATGATCTGACTGCC    |
| IL-1 $\beta$ | Forward | CAGGCTGCTCTGGGATTCTC     |
|              | Reverse | CCTGGAAGGAGCACTTCATCT    |
| RPLP0        | Forward | CTATCATCAACGGGTACAAACGAG |
|              | Reverse | CAGATGGATCAGCCAAGAAGG    |
| GAPDH        | Forward | GTCTTCACCACCATGGAGAAGG   |
|              | Reverse | ATGATCTTGAGGCTGTTGTCAT   |
